# Supplementary material
Source: PubMed Central journal article supplement (PMC3784300)

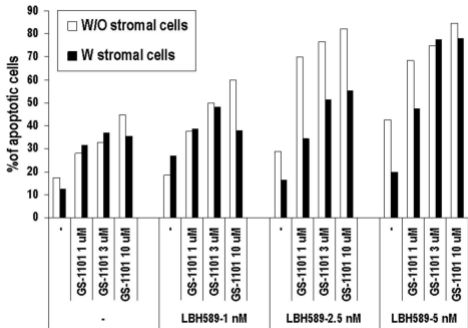

## SU-DHL-6

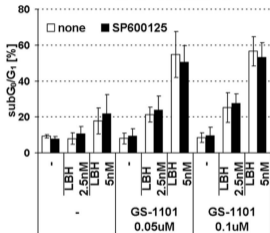

## SU-DHL-16

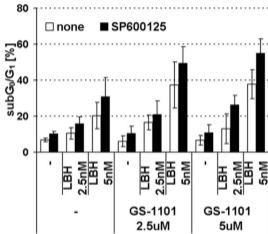

**A**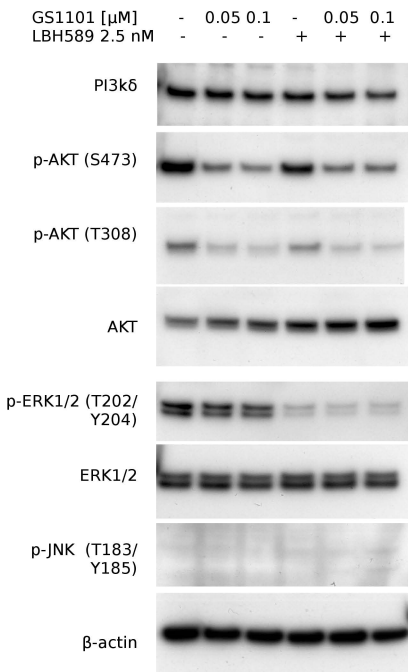**B**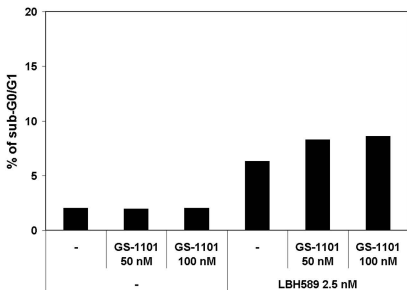

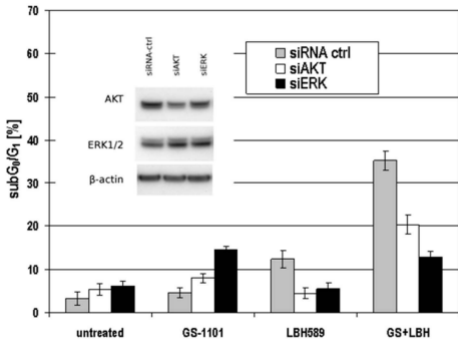

Supplement: NIHMS504524-supplement-Supp_Fig_S1-S4.pdf [file NIHMS504524-supplement-Supp_Fig_S1-S4.pdf]
